# Supplementary material for: Prediction of VRC01 neutralization sensitivity by HIV-1 gp160 sequence features
Source: PubMed Central journal article supplement (PMC6459550; doi:10.1371/journal.pcbi.1006952), 2019-04-01

**A****Model (CV-AUC)**

- Best Learner: screen.all\_SL.randomForest (0.886)
- 2nd: screen.all\_SuperLearner: (0.828)
- 3rd: screen.geog.AAchPNGS\_SL.randomForest (0.819)
- 4th: screen.all\_SL.glmnet (0.816)

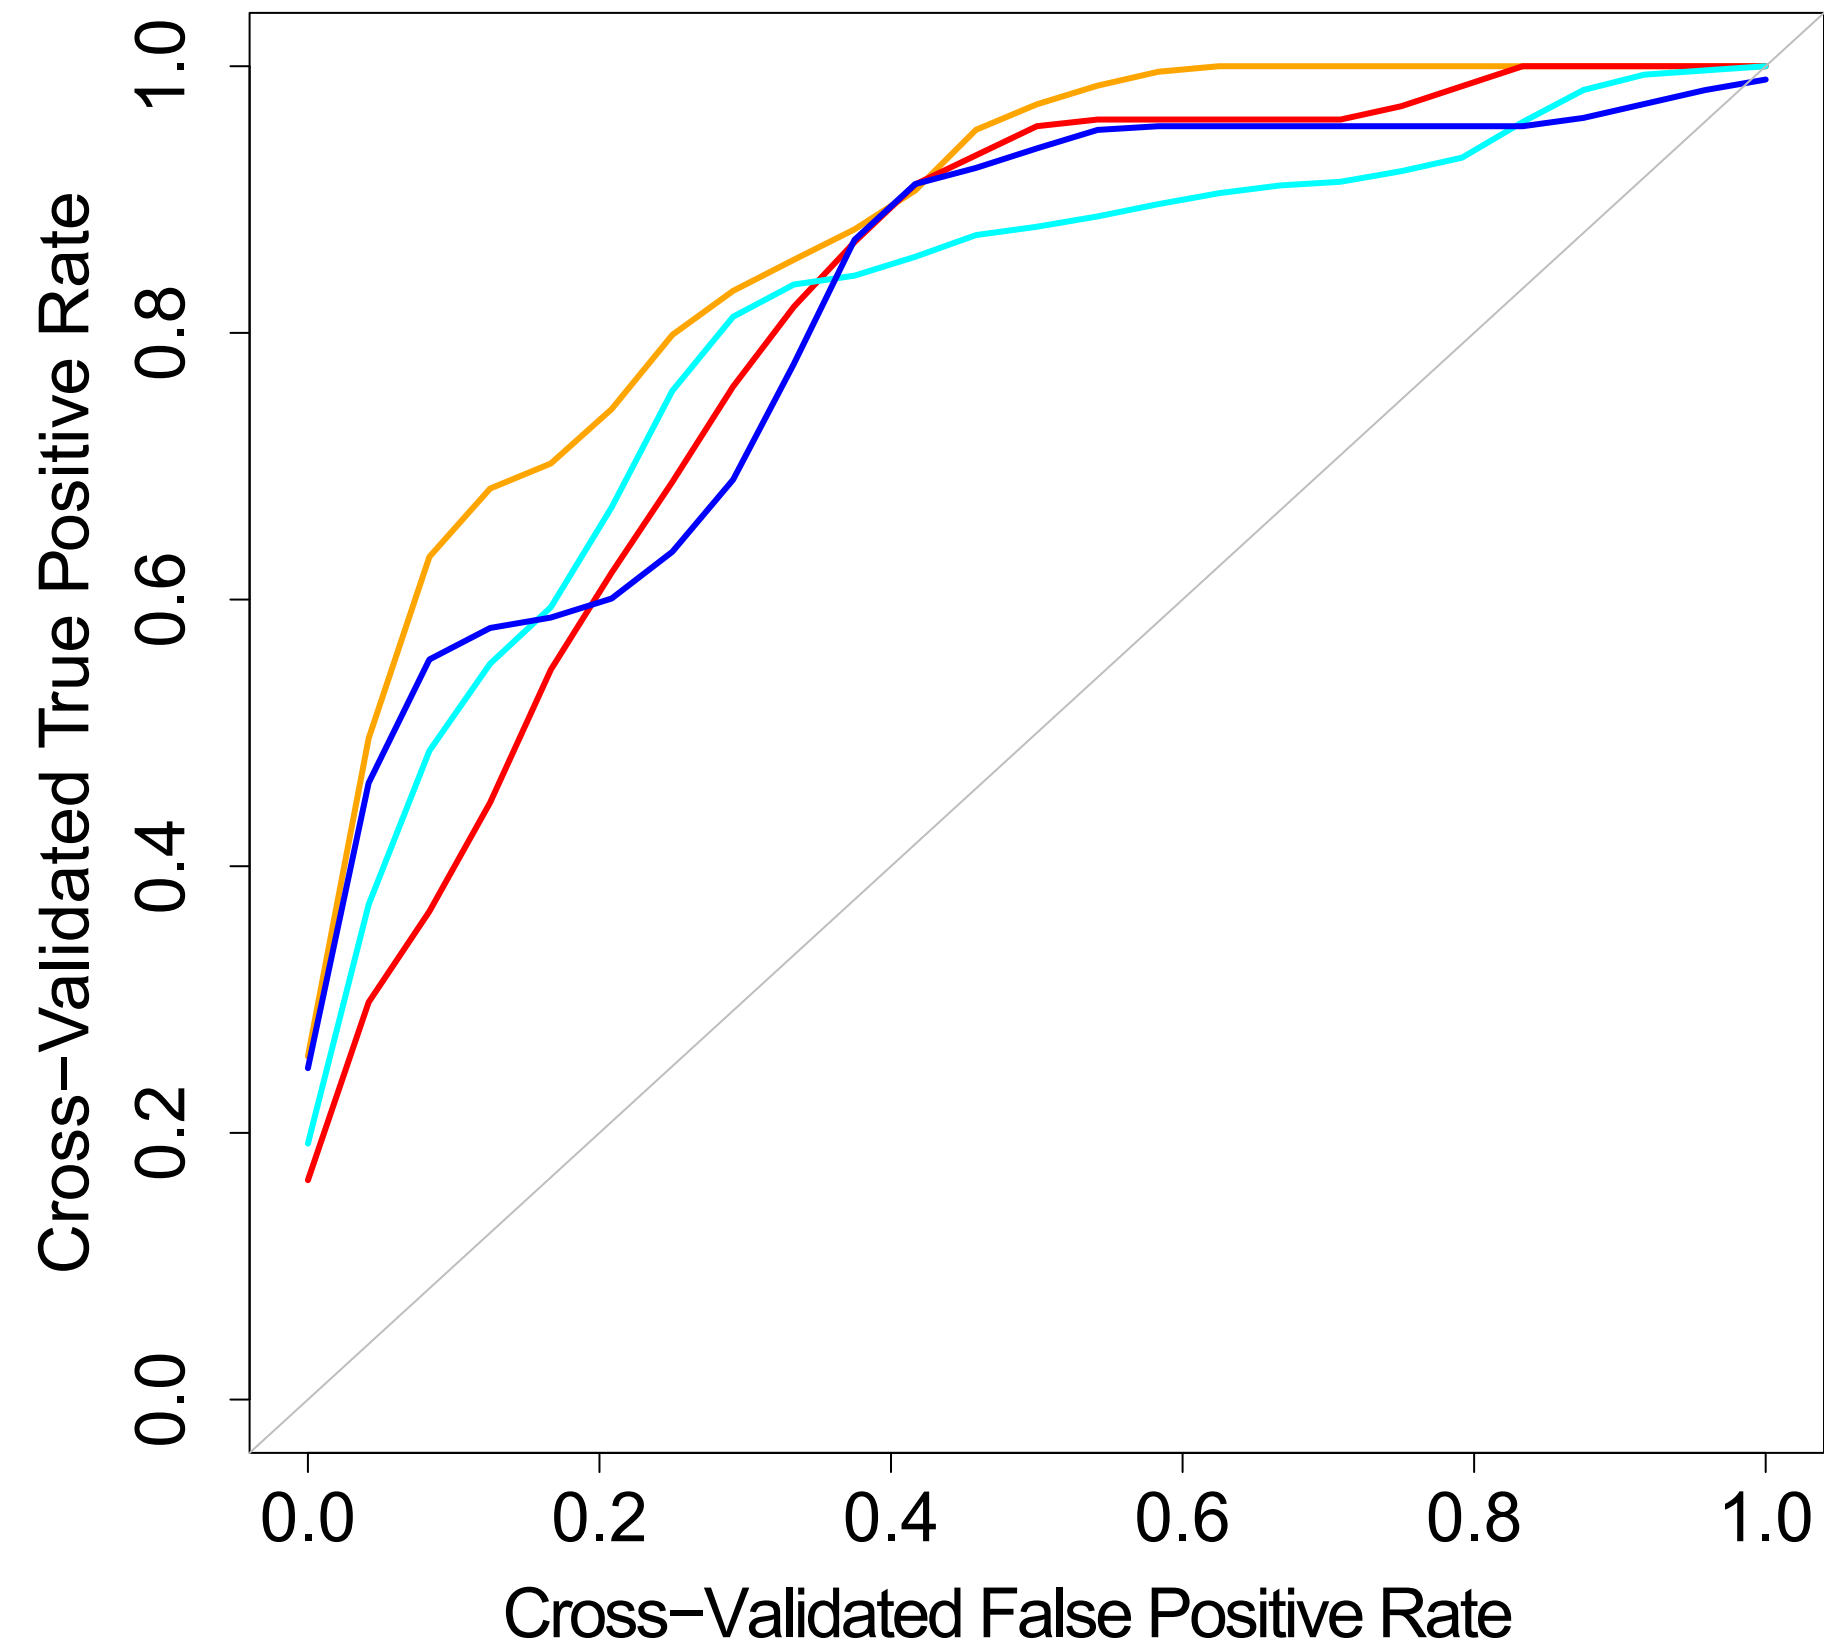**B****Model (CV-AUC)**

- Best Learner: screen.all\_SL.randomForest (0.881)
- 2nd: screen.geog.AAchCD4bs\_SL.randomForest (0.873)
- 3rd: screen.all\_SuperLearner: (0.872)
- 4th: screen.geog.AAchVRC01\_SL.randomForest (0.839)

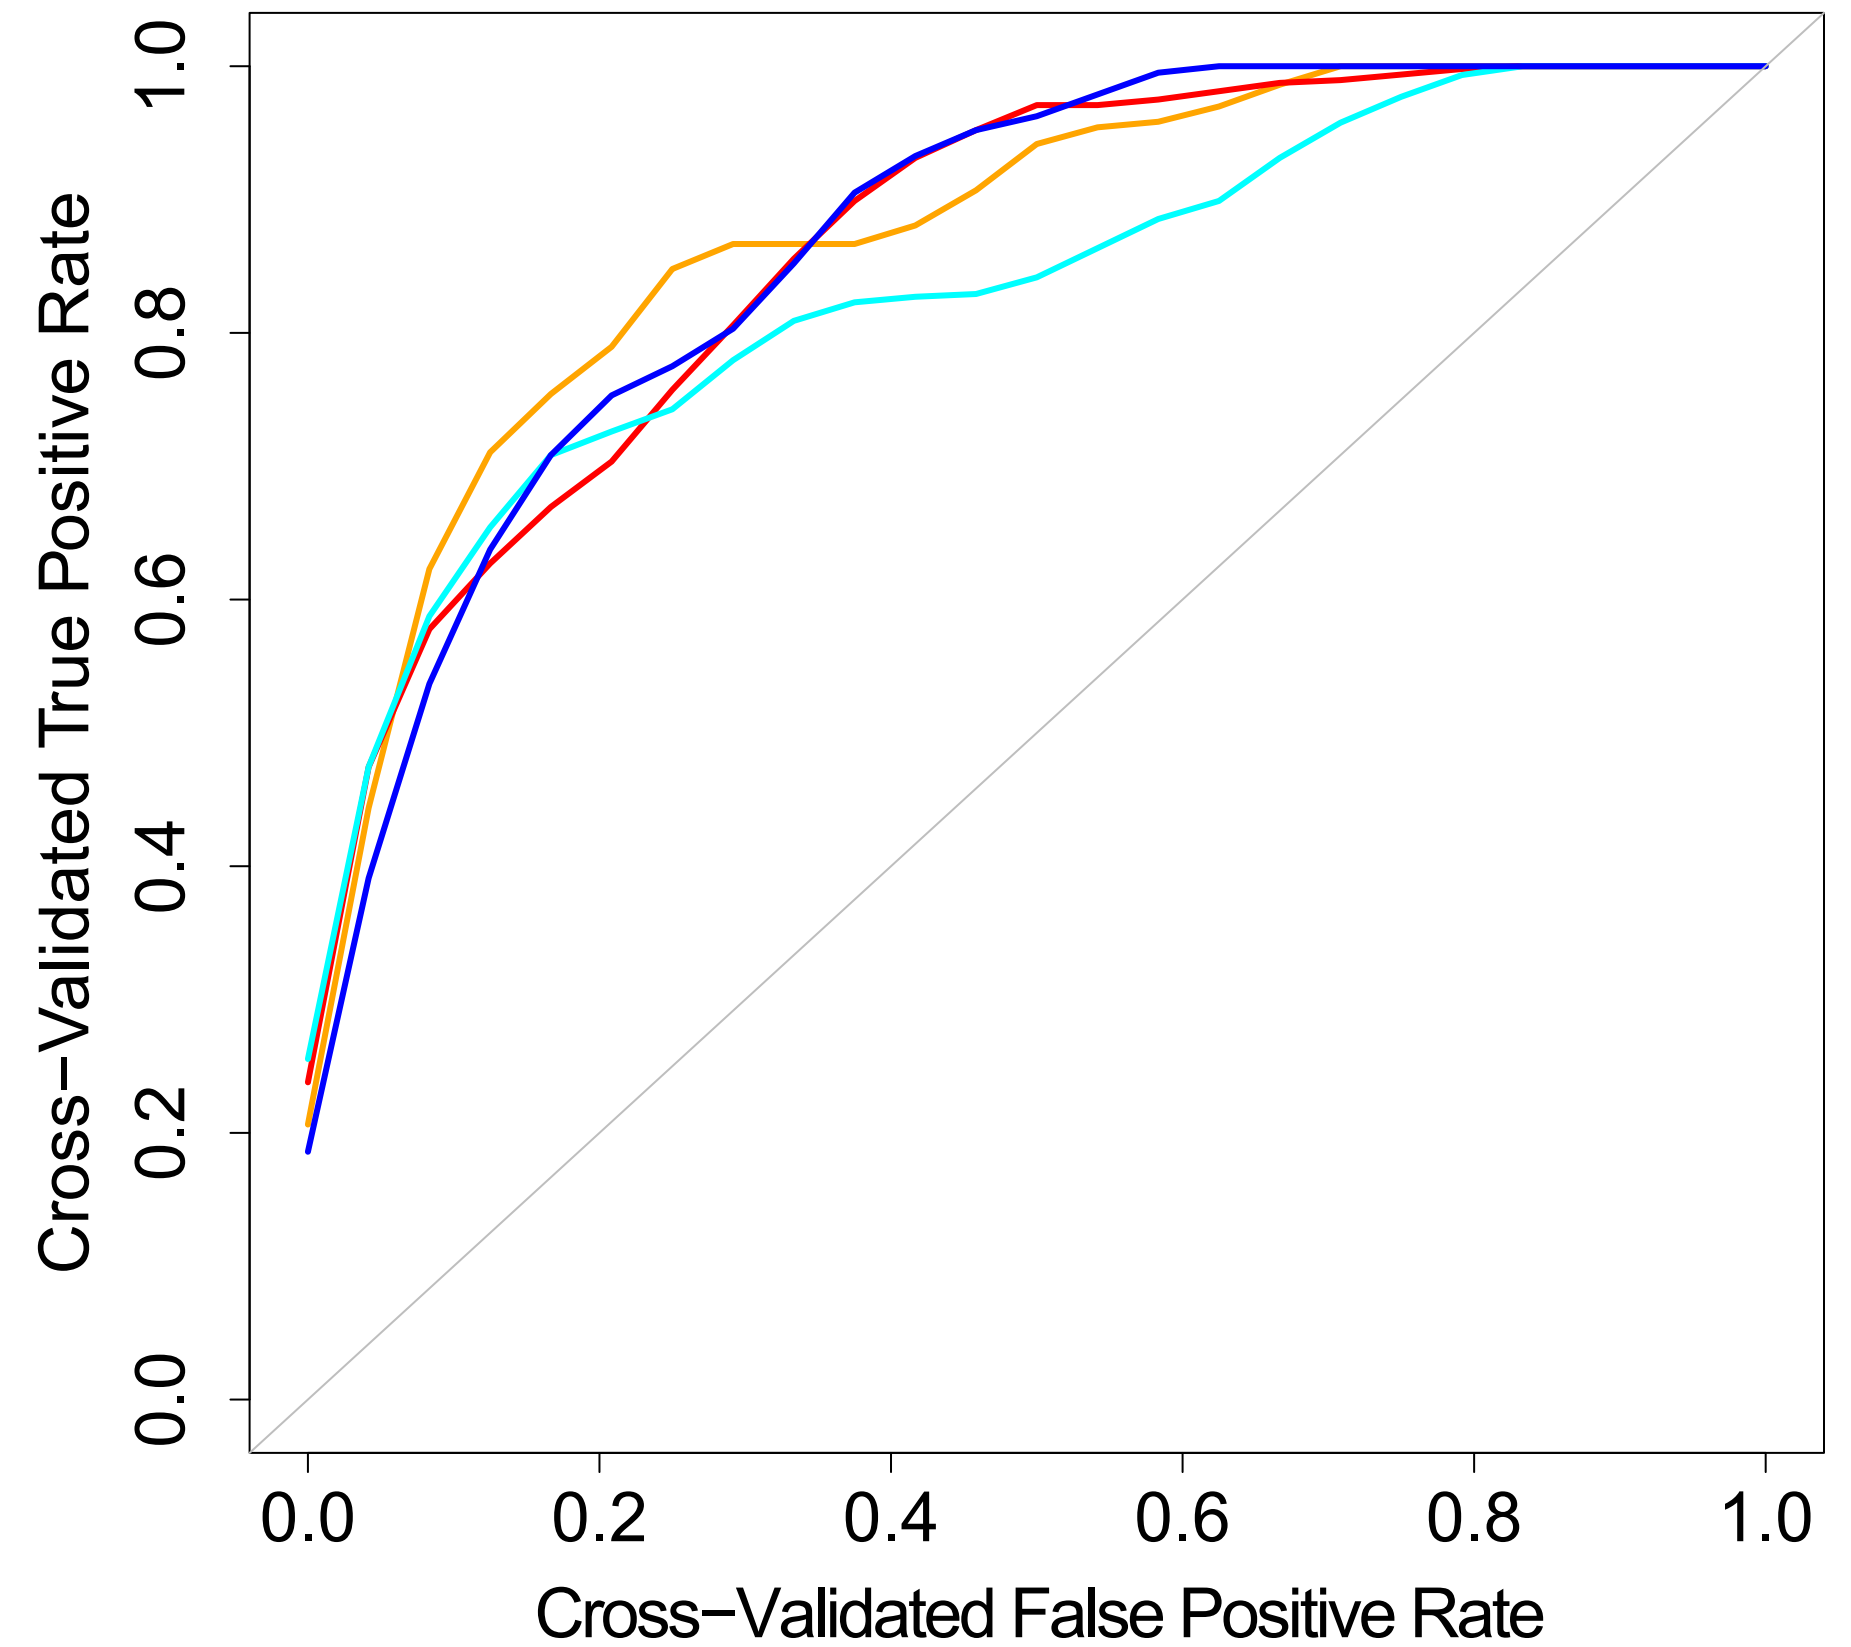

Supplement: pcbi.1006952.s001.pdf [file pcbi.1006952.s001.pdf]
