# Supplementary material for: Prediction of VRC01 neutralization sensitivity by HIV-1 gp160 sequence features
Source: PubMed Central journal article supplement (PMC6459550; doi:10.1371/journal.pcbi.1006952), 2019-04-01
Supplement: pcbi.1006952.s008.pdf [file pcbi.1006952.s008.pdf]

A

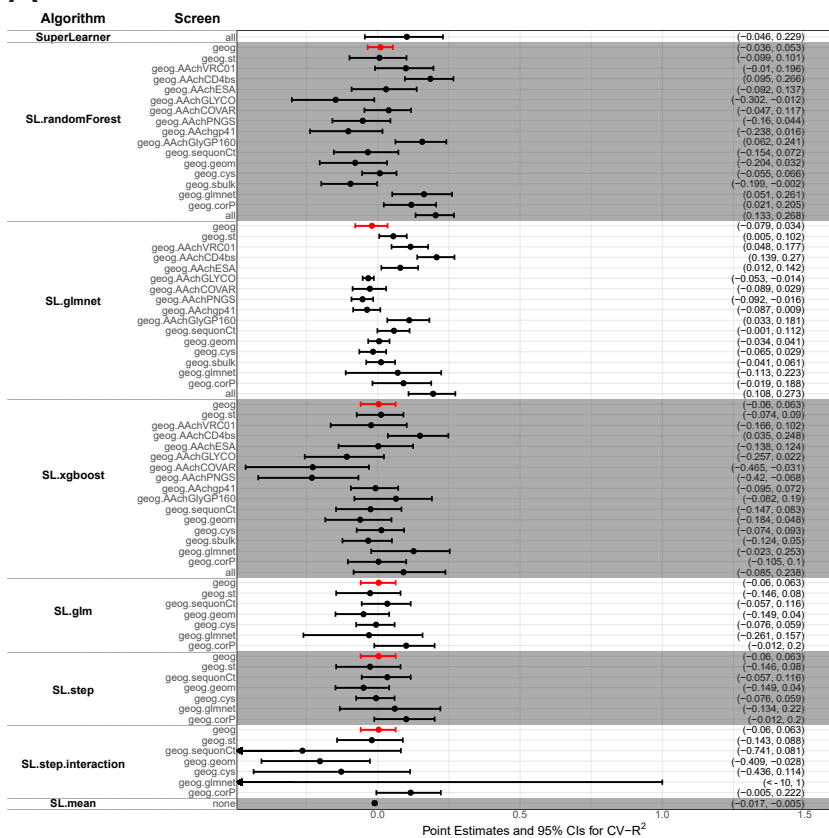Point Estimates and 95% CIs for CV-R<sup>2</sup>

B

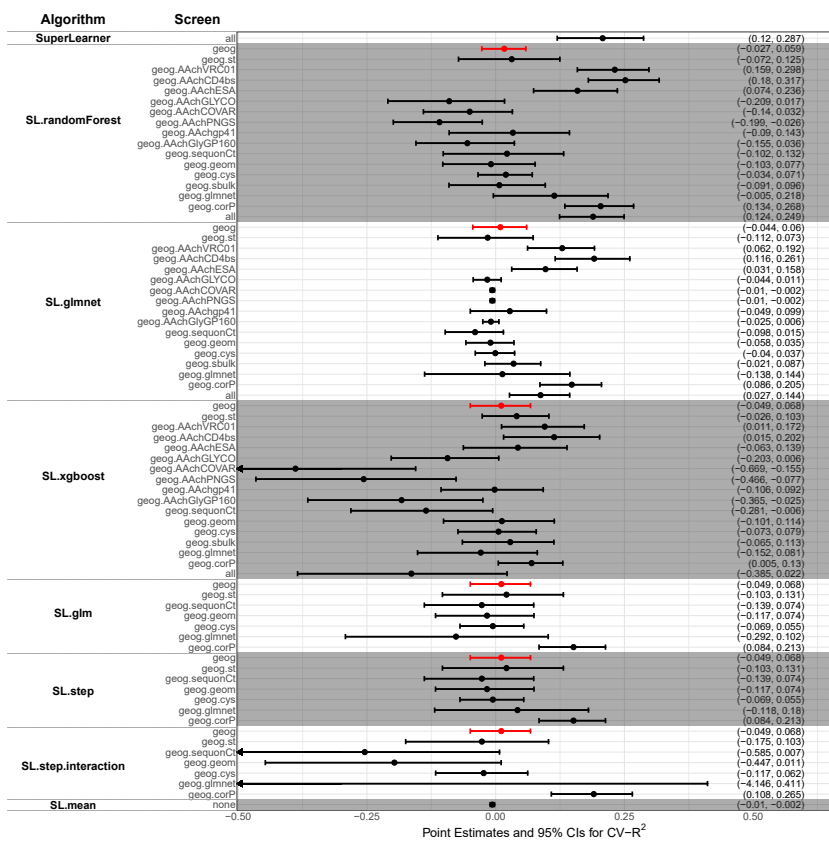Point Estimates and 95% CIs for CV-R<sup>2</sup>
