# Supplementary material for: Prediction of VRC01 neutralization sensitivity by HIV-1 gp160 sequence features
Source: PubMed Central journal article supplement (PMC6459550; doi:10.1371/journal.pcbi.1006952), 2019-04-01
Supplement: pcbi.1006952.s011.pdf [file pcbi.1006952.s011.pdf]

### IC<sub>50</sub> Censored

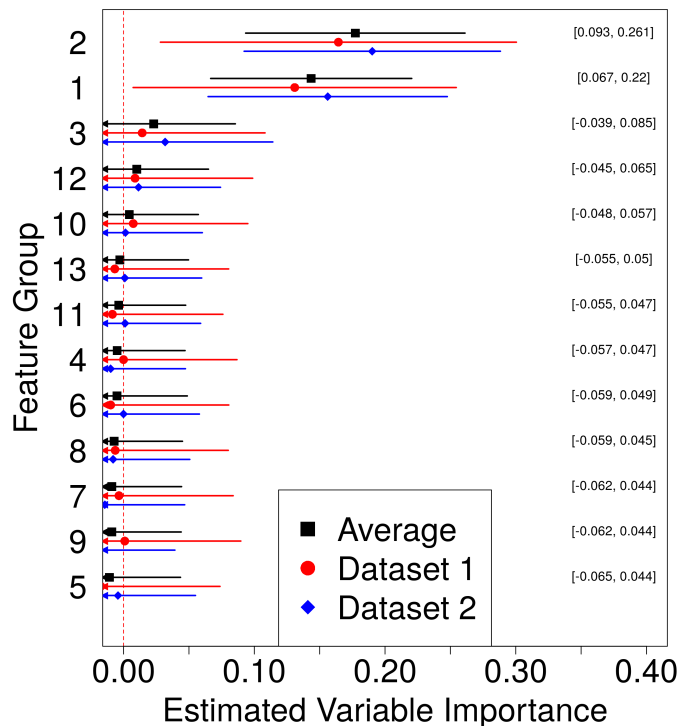

### Sensitive/Resistant Only

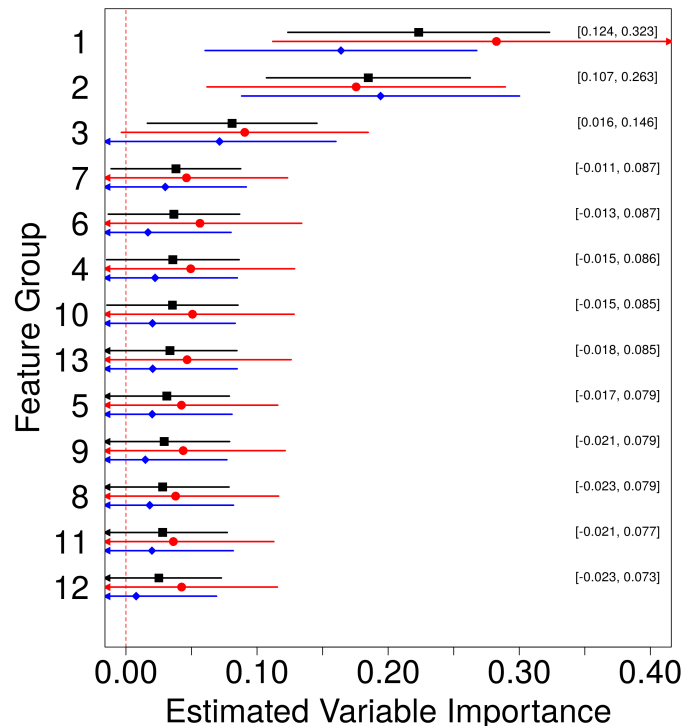

### Quantitative IC<sub>50</sub>

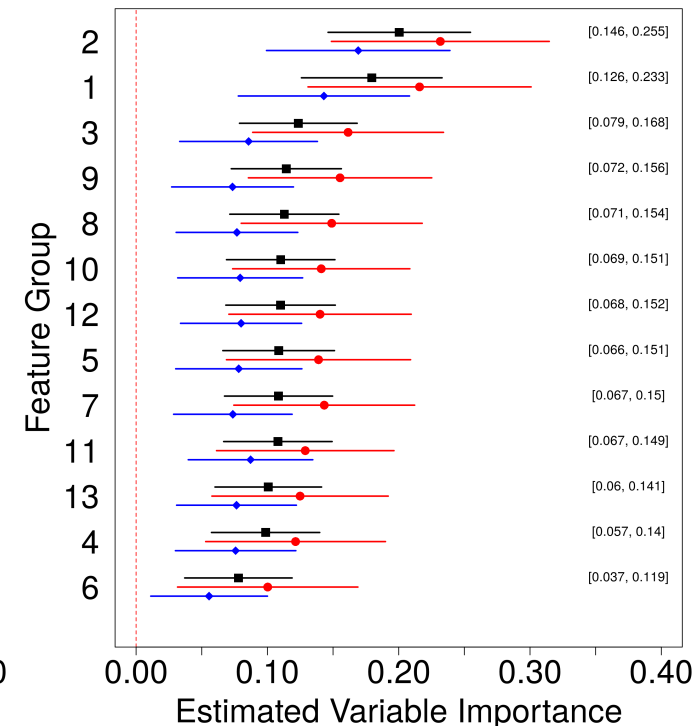

### Quantitative IC<sub>80</sub>

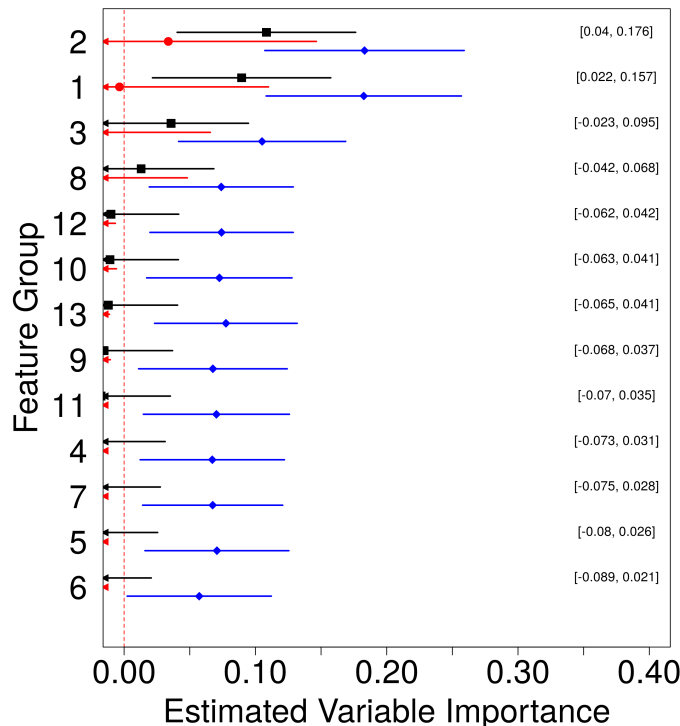

### Neutralization Slope

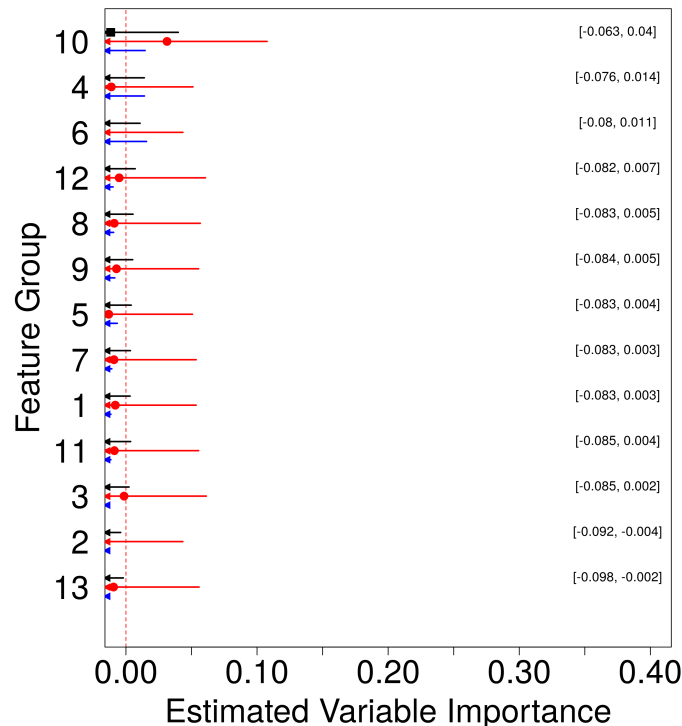

### Feature group definitions

|    |                                                                                      |
|----|--------------------------------------------------------------------------------------|
| 1  | VRC01 binding footprint                                                              |
| 2  | CD4 binding sites                                                                    |
| 3  | Sites with sufficient exposed surface area                                           |
| 4  | Sites identified as important for glycosylation                                      |
| 5  | Sites with residues that covary with the VRC01 binding footprint                     |
| 6  | Sites associated with VRC01-specific potential N-linked glycosylation (PNGS) effects |
| 7  | gp41 sites important for VRC01 binding                                               |
| 8  | Sites for indicating N-linked glycosylation                                          |
| 9  | Majority virus subtypes                                                              |
| 10 | Region-specific counts of PNGS                                                       |
| 11 | Viral geometry                                                                       |
| 12 | Cysteine counts                                                                      |
| 13 | Steric bulk at critical locations                                                    |
