# Supplementary material for: Prediction of VRC01 neutralization sensitivity by HIV-1 gp160 sequence features
Source: PubMed Central journal article supplement (PMC6459550; doi:10.1371/journal.pcbi.1006952), 2019-04-01

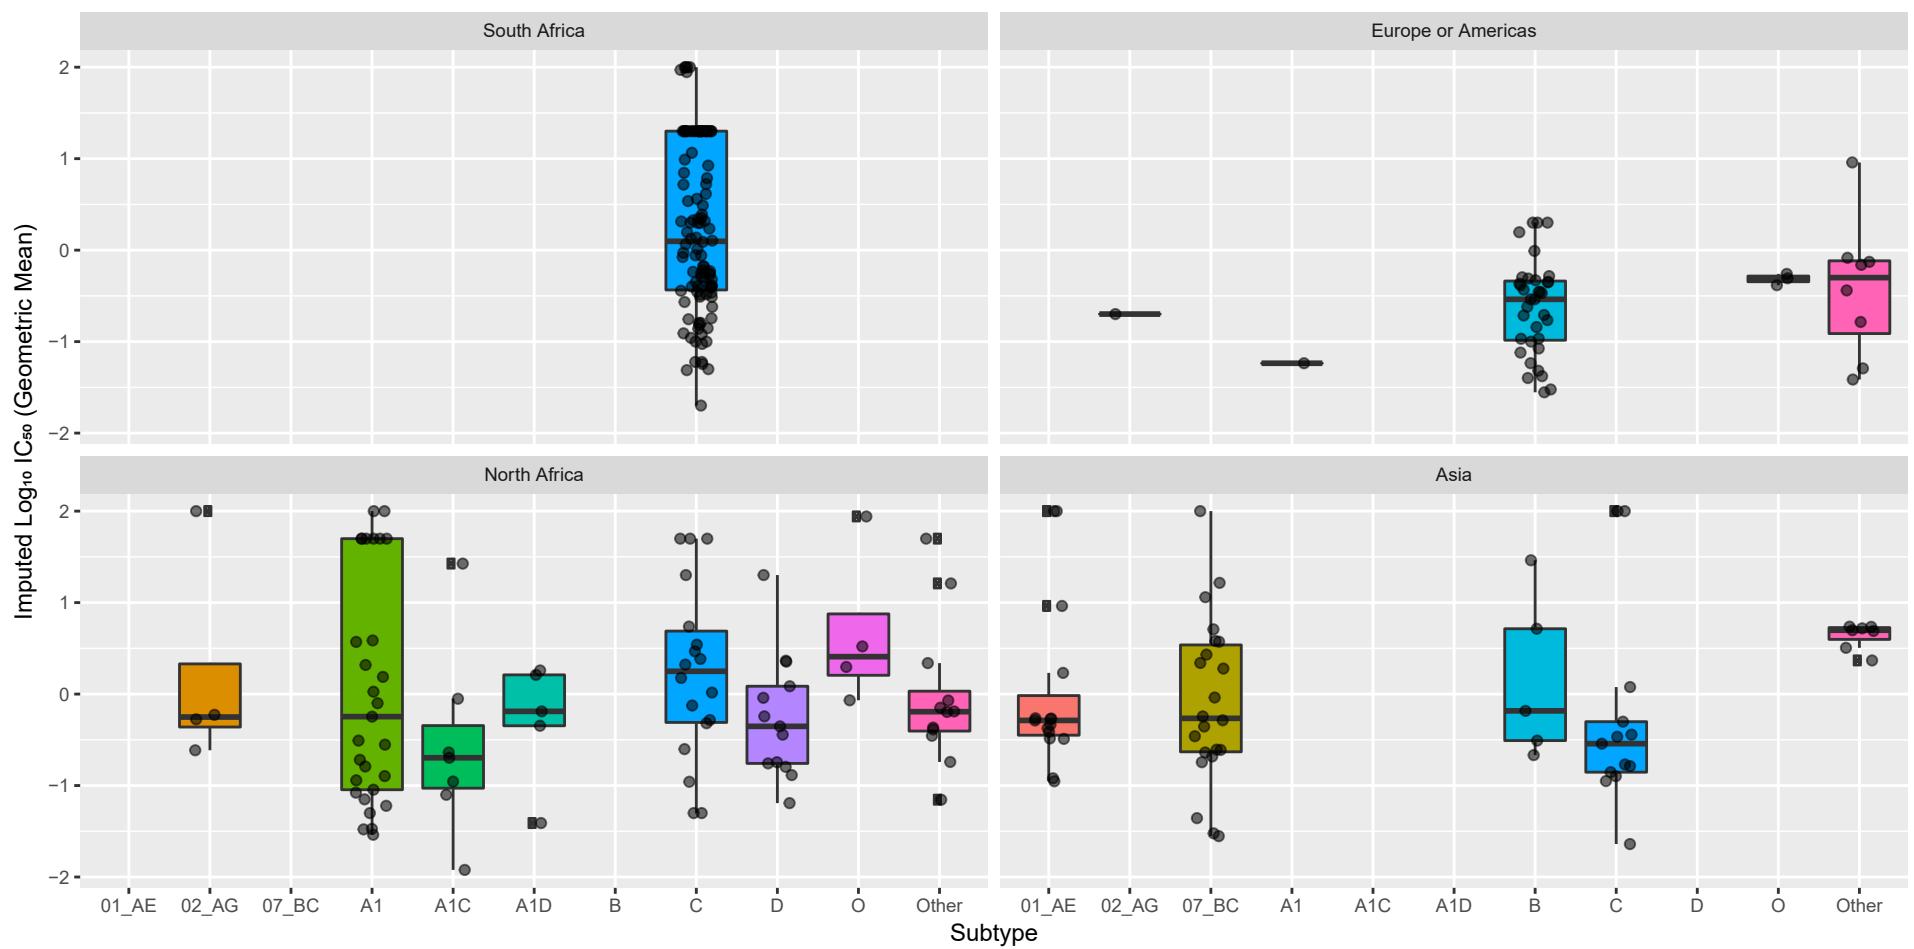

Supplement: pcbi.1006952.s012.pdf [file pcbi.1006952.s012.pdf]
